# Supplementary material
Source: Springer Nature journal article supplement (https://www.springermedizin.de/resource/supplementary/12936_2012_2568_MOESM2_ESM.pdf/9543254)
Supplement: MOESM2 [file 9543254]

Additional Table 2. Control and malaria group genotypic frequencies

| Gene           | dbSNP ID  | N   | Genotypes  |            |            |
|----------------|-----------|-----|------------|------------|------------|
| <i>IL1B</i>    |           |     |            |            |            |
| -5839C>T       | rs1143629 |     | TT         | TC         | CC         |
| Control        |           | 263 | 83 (31.5)  | 117 (44.5) | 63 (24.0)  |
| Malaria        |           | 216 | 48 (22.2)  | 101 (46.8) | 67 (31.0)  |
| -31C>T         | rs1143627 |     | CC         | CT         | TT         |
| Control        |           | 263 | 80 (30.4)  | 105 (39.9) | 78 (29.7)  |
| Malaria        |           | 215 | 72 (33.5)  | 95 (44.2)  | 48 (22.3)  |
| -511A>G        | rs16944   |     | GG         | GA         | AA         |
| Control        |           | 261 | 80 (30.7)  | 112 (42.9) | 69 (26.4)  |
| Malaria        |           | 214 | 50 (23.4)  | 93 (43.5)  | 71 (33.1)  |
| <i>IL2</i>     |           |     |            |            |            |
| -330G>T        | rs2069762 |     | TT         | GT         | GG         |
| Control        |           | 262 | 130 (49.6) | 113 (43.1) | 19 (7.3)   |
| Malaria        |           | 216 | 84 (38.9)  | 109 (50.5) | 23 (10.6)  |
| <i>IL4</i>     |           |     |            |            |            |
| -590C>T        | rs2243250 |     | CC         | CT         | TT         |
| Control        |           | 263 | 88 (33.5)  | 133 (50.5) | 42 (16.0)  |
| Malaria        |           | 216 | 58 (26.9)  | 113 (52.3) | 45 (20.8)  |
| <i>IL4R</i>    |           |     |            |            |            |
| 1902A>G        | rs1801275 |     | GG         | GA         | AA         |
| Control        |           | 263 | 131 (49.8) | 93 (35.4)  | 39 (14.8)  |
| Malaria        |           | 216 | 78 (36.1)  | 109 (50.5) | 29 (13.4)  |
| <i>IL6</i>     |           |     |            |            |            |
| -174C>G        | rs1800795 |     | GG         | GC         | CC         |
| Control        |           | 263 | 162 (61.6) | 92 (35.0)  | 9 (3.4)    |
| Malaria        |           | 216 | 147 (68.1) | 61 (28.2)  | 8 (3.7)    |
| <i>IL8</i>     |           |     |            |            |            |
| -251A>T        | rs4073    |     | AA         | AT         | TT         |
| Control        |           | 263 | 56 (21.3)  | 128 (48.7) | 79 (30.0)  |
| Malaria        |           | 212 | 43 (20.3)  | 108 (50.9) | 61 (28.8)  |
| <i>IL10</i>    |           |     |            |            |            |
| -592A>C        | rs1800872 |     | AA         | AC         | CC         |
| Control        |           | 263 | 35 (13.3)  | 110 (41.8) | 118 (44.9) |
| Malaria        |           | 216 | 28 (13.0)  | 107 (49.5) | 81 (37.5)  |
| -1082T>C       | rs1800896 |     | GG         | GA         | AA         |
| Control        |           | 263 | 133 (50.6) | 106 (40.3) | 24 (9.1)   |
| Malaria        |           | 216 | 128 (59.3) | 77 (35.6)  | 11 (5.1)   |
| -819C>T        | rs1800871 |     | TT         | TC         | CC         |
| Control        |           | 262 | 36 (13.7)  | 109 (41.6) | 117 (44.7) |
| Malaria        |           | 215 | 29 (13.5)  | 105 (48.8) | 81 (37.7)  |
| <i>IL12A</i>   |           |     |            |            |            |
| 121G>A         | rs568408  |     | AA         | AG         | GG         |
| Control        |           | 223 | 5 (2.2)    | 38 (17.0)  | 180 (80.8) |
| Malaria        |           | 213 | 3 (1.4)    | 32 (15.0)  | 178 (83.6) |
| <i>IL12B</i>   |           |     |            |            |            |
| 735T>C         | rs7709212 |     | TT         | TC         | CC         |
| Control        |           | 226 | 70 (31.0)  | 113 (50.0) | 43 (19.0)  |
| Malaria        |           | 213 | 66 (31.0)  | 94 (44.1)  | 53 (24.9)  |
| 458A>G         | rs2546890 |     | AA         | AG         | GG         |
| Control        |           | 237 | 49 (20.7)  | 92 (38.8)  | 96 (40.5)  |
| Malaria        |           | 214 | 28 (13.1)  | 88 (41.1)  | 98 (45.8)  |
| 159A>C         | rs3212227 |     | AA         | CA         | AA         |
| Control        |           | 260 | 49 (18.8)  | 102 (39.2) | 109 (42.0) |
| Malaria        |           | 213 | 42 (19.7)  | 99 (46.5)  | 72 (33.8)  |
| <i>IL12RB1</i> |           |     |            |            |            |

|                 |            |     |            |            |            |
|-----------------|------------|-----|------------|------------|------------|
| -1094A>G        | rs375947   |     | AA         | AG         | GG         |
| Control         |            | 263 | 160 (60.8) | 83 (31.6)  | 20 (7.6)   |
| Malaria         |            | 215 | 132 (61.4) | 76 (35.3)  | 7 (3.3)    |
| -641C>T         | rs11575934 |     | GG         | GA         | AA         |
| Control         |            | 262 | 17 (6.5)   | 75 (28.6)  | 170 (64.9) |
| Malaria         |            | 214 | 6 (2.8)    | 73 (34.1)  | 135 (63.1) |
| <i>SP110</i>    |            |     |            |            |            |
| 14622C>T        | rs2114592  |     | CC         | CT         | TT         |
| Control         |            | 262 | 221 (84.4) | 39 (14.8)  | 2 (0.8)    |
| Malaria         |            | 215 | 176 (81.9) | 38 (17.6)  | 1 (0.5)    |
| 1274C>T         | rs3948464  |     | CC         | CT         | TT         |
| Control         |            | 263 | 201 (76.4) | 61 (23.2)  | 1 (0.4)    |
| Malaria         |            | 215 | 160 (74.1) | 53 (24.5)  | 3 (1.4)    |
| <i>TNF</i>      |            |     |            |            |            |
| -308C>T         | rs1800629  |     | AA         | AG         | GG         |
| Control         |            | 263 | 2 (0.8)    | 36 (13.7)  | 225 (85.5) |
| Malaria         |            | 213 | 1 (0.5)    | 29 (13.6)  | 183 (85.9) |
| -1031C>T        | rs1799964  |     | CC         | CT         | TT         |
| Control         |            | 263 | 12 (4.6)   | 102 (38.8) | 149 (56.6) |
| Malaria         |            | 215 | 9 (4.2)    | 76 (35.3)  | 130 (60.5) |
| -238A>G         | rs361525   |     | AA         | AG         | GG         |
| Control         |            | 224 | 3 (1.3)    | 27 (12.1)  | 194 (86.6) |
| Malaria         |            | 214 | 3 (1.4)    | 20 (9.3)   | 191 (89.3) |
| -863A>C         | rs1800630  |     | AA         | AC         | CC         |
| Control         |            | 252 | 22 (8.7)   | 62 (24.6)  | 168 (66.7) |
| Malaria         |            | 213 | 21 (9.9)   | 44 (20.7)  | 148 (69.5) |
| -857C>T         | rs1799724  |     | TT         | TC         | CC         |
| Control         |            | 205 | 8 (3.9)    | 43 (21.0)  | 154 (75.1) |
| Malaria         |            | 213 | 6 (2.8)    | 52 (24.4)  | 155 (72.8) |
| <i>TNFRSF1A</i> |            |     |            |            |            |
| 303A>G          | rs4149622  |     | AA         | AG         | GG         |
| Control         |            | 263 | 193 (73.4) | 65 (24.7)  | 5 (1.9)    |
| Malaria         |            | 214 | 146 (68.2) | 64 (29.9)  | 4 (1.9)    |
| <i>IFNG</i>     |            |     |            |            |            |
| 874A>T          | rs2430561  |     | TT         | TA         | AA         |
| Control         |            | 262 | 144 (55.0) | 101 (38.5) | 17 (6.5)   |
| Malaria         |            | 214 | 111 (51.9) | 85 (39.7)  | 18 (8.4)   |
| <i>IFNGR1</i>   |            |     |            |            |            |
| -611(C>T)       | rs1327474  |     | GG         | GA         | AA         |
| Control         |            | 209 | 21 (10.0)  | 80 (38.3)  | 108 (51.7) |
| Malaria         |            | 213 | 15 (7.0)   | 81 (38.1)  | 117 (54.9) |
| -56T>C          | rs2234711  |     | TT         | TC         | CC         |
| Control         |            | 250 | 99 (39.6)  | 103 (41.2) | 48 (19.2)  |
| Malaria         |            | 214 | 82 (38.3)  | 101 (47.2) | 31 (14.5)  |
| <i>VDR</i>      |            |     |            |            |            |
| FokI            | rs10735810 |     | CC         | CT         | TT         |
| Control         |            | 259 | 116 (44.8) | 105 (40.5) | 38 (14.7)  |
| Malaria         |            | 214 | 90 (42.1)  | 96 (44.8)  | 28 (13.1)  |
| TaqI            | rs731236   |     | TT         | TC         | CC         |
| Control         |            | 262 | 146 (55.7) | 90 (34.4)  | 26 (9.9)   |
| Malaria         |            | 179 | 84 (46.9)  | 83 (46.4)  | 12 (6.7)   |
| BsmI            | rs1544410  |     | GG         | GA         | AA         |
| Control         |            | 263 | 139 (52.9) | 100 (38.0) | 24 (9.1)   |
| Malaria         |            | 210 | 107 (51.0) | 91 (43.3)  | 12 (5.7)   |
| <i>PTPN22</i>   |            |     |            |            |            |
| R630W           | rs2476601  |     | GG         | GA         | AA         |
| Control         |            | 263 | 236 (89.7) | 27 (10.3)  | 0          |
| Malaria         |            | 215 | 21 (9.8)   | 194 (90.2) | 0          |

|             |           |     |            |           |         |
|-------------|-----------|-----|------------|-----------|---------|
| <i>P2X7</i> |           |     |            |           |         |
| 1513T>G     | rs3751143 |     | TT         | TG        | GG      |
| Control     |           | 263 | 164 (62.4) | 91 (34.6) | 8 (3.0) |
| Malaria     |           | 211 | 148 (70.1) | 60 (28.5) | 3 (1.4) |

---
